# Supplementary material
Source: PubMed Central journal article supplement (PMC6384139)
Supplement: NIHMS1010470-supplement-Supporting_Information.pdf [file NIHMS1010470-supplement-Supporting_Information.pdf]

# Hole Hopping Across a Protein-Protein Interface

Kana Takematsu,<sup>a</sup> Petr Pospíšil,<sup>b</sup> Martin Pižl,<sup>b,c</sup> Michael Towrie,<sup>d</sup> Jan Heyda,<sup>b,c</sup> Stanislav Záliš,<sup>b</sup>  
Jens T. Kaiser,<sup>e</sup> Jay R. Winkler,<sup>e,\*</sup> Harry B. Gray,<sup>e,\*</sup> Antonín Vlček,<sup>b,f,\*</sup>

<sup>a</sup> Department of Chemistry, Bowdoin College, Brunswick, ME 04011, USA

<sup>b</sup> J. Heyrovský Institute of Physical Chemistry, Academy of Sciences of the Czech Republic,  
Dolejškova 3, CZ-182 23 Prague, Czech Republic

<sup>c</sup> University of Chemistry and Technology, Prague, Technická 5, CZ-166 28 Prague, Czech  
Republic

<sup>d</sup> Central Laser Facility, Research Complex at Harwell, Science and Technology Facilities Council,  
Rutherford Appleton Laboratory, Harwell Oxford, Didcot, Oxfordshire, OX11 0FA, UK

<sup>e</sup> Beckman Institute, California Institute of Technology, Pasadena, CA 91125, USA

<sup>f</sup> Queen Mary University of London, School of Biological and Chemical Sciences, Mile End Road,  
London E1 4NS, United Kingdom

## Supporting Information

### Contents:

|                                                        |        |
|--------------------------------------------------------|--------|
| S1. Structures .....                                   | p. S2  |
| S2. Luminescence decay .....                           | p. S5  |
| S3. Time-resolved IR spectroscopy and mechanisms ..... | p. S9  |
| S4. Representative kinetics fits .....                 | p. S14 |
| References .....                                       | p. S18 |

## Section S1: Structures

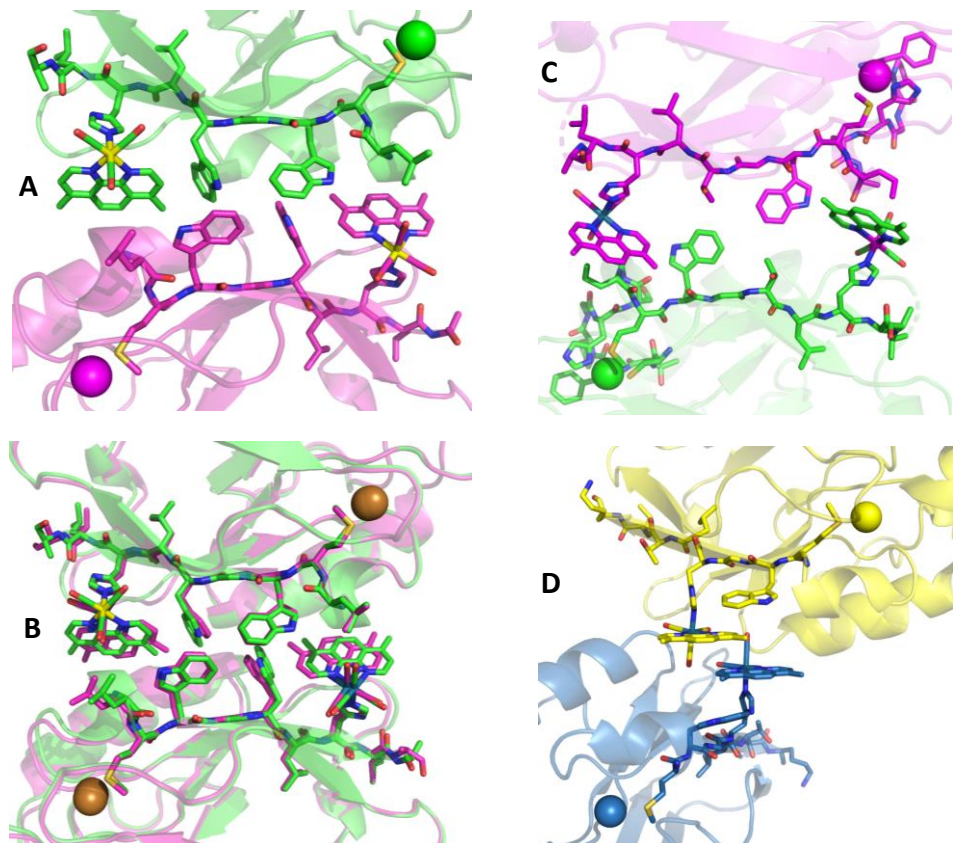

**Figure S1.** Structures of the protein-protein interfacial regions of  $\text{Re126WWCu}^{\text{II}}$  (A),  $\text{Re126WWCu}^{\text{II}}$  and  $\text{Re126FWCu}^{\text{II}}$  in superposition (B),  $\text{Re126TWCu}^{\text{II}}$  (ref.<sup>1</sup>) (C), and  $\text{Re124W122Cu}^{\text{II}}$  (D). In  $\{\text{Re124W122Cu}^{\text{II}}\}_2$ , the dmp ligands are separated by 4.5 Å; and the shortest *intermolecular* dmp-W122' distance is 7.1 Å.

**Table S1.** Shortest atom-atom intramolecular distances between redox-active sites.<sup>2</sup> (Only aromatic C and N atoms, as well as Re and Cu are considered. Values averaged over the molecules comprising the asymmetric unit.)

| Distance  | Re126FWCu <sup>II</sup> | Re126WWCu <sup>II</sup> | Re126WFCu <sup>II</sup> <sup>a</sup> | Re124W122Cu <sup>II</sup> <sup>g</sup> |
|-----------|-------------------------|-------------------------|--------------------------------------|----------------------------------------|
| Re–W124   | -                       | 6.9                     | 7.6                                  | -                                      |
| dmp–W124  | -                       | 3.5 <sup>b</sup>        | 3.7 <sup>c</sup>                     | -                                      |
| W124–W122 | -                       | 3.9 <sup>d</sup>        | -                                    | -                                      |
| Re–W122   | 11.1                    | 11.4                    | -                                    | 6.3                                    |
| dmp–W122  | 7.1                     | 7.8                     | -                                    | 3.4                                    |
| Cu–W122   | 10.7                    | 10.7                    | 15.7 <sup>e</sup>                    | 10.8                                   |
| Cu–dmp    | 20.2                    | 20.6                    | 19.9                                 | 16.0 <sup>f</sup>                      |
| Cu–Re     | 23.3                    | 22.9                    | 22.7                                 | 19.4                                   |
| Angle (°) |                         |                         |                                      |                                        |
| dmp–W124  | -                       | 67.7                    |                                      | 20.8 <sup>h</sup>                      |
| W124–W122 | -                       | 78.7                    |                                      | -                                      |

<sup>a</sup> Two molecules with different Re/W122-indole orientations are present. The listed distances are pertinent to the molecule with closer contacts. <sup>b</sup> An additional close contact (3.9 Å) exists between the W124 indole ring and C(CH<sub>3</sub>-dmp). <sup>c</sup> Closest distance between the indole ring and C(CH<sub>3</sub>-dmp) = 3.5 Å. <sup>d</sup> The distances in the four molecules comprising the asymmetric cell are in the range 3.6–4.1 Å. <sup>e</sup> Cu–W124 distance. <sup>f</sup> Closest distance between Cu and C(CH<sub>3</sub>-dmp) = 15.3 Å. <sup>g</sup> PDB: 2I7O, see Figure S1. <sup>h</sup> dmp–W122

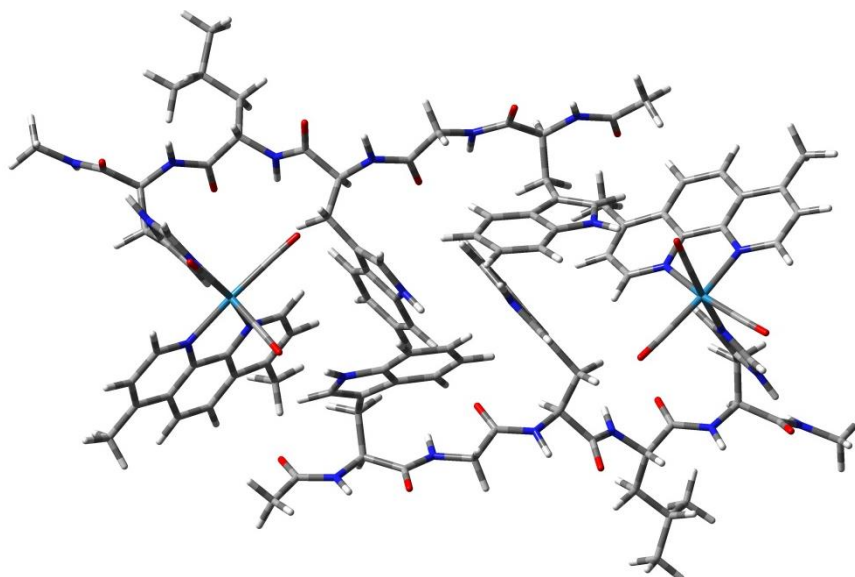

**Figure S2.** DFT (PBE0-D3) optimized structure of {Re(CO)<sub>3</sub>(dmp)H126A125W124G123W122}<sub>2</sub> in a water dielectric continuum.

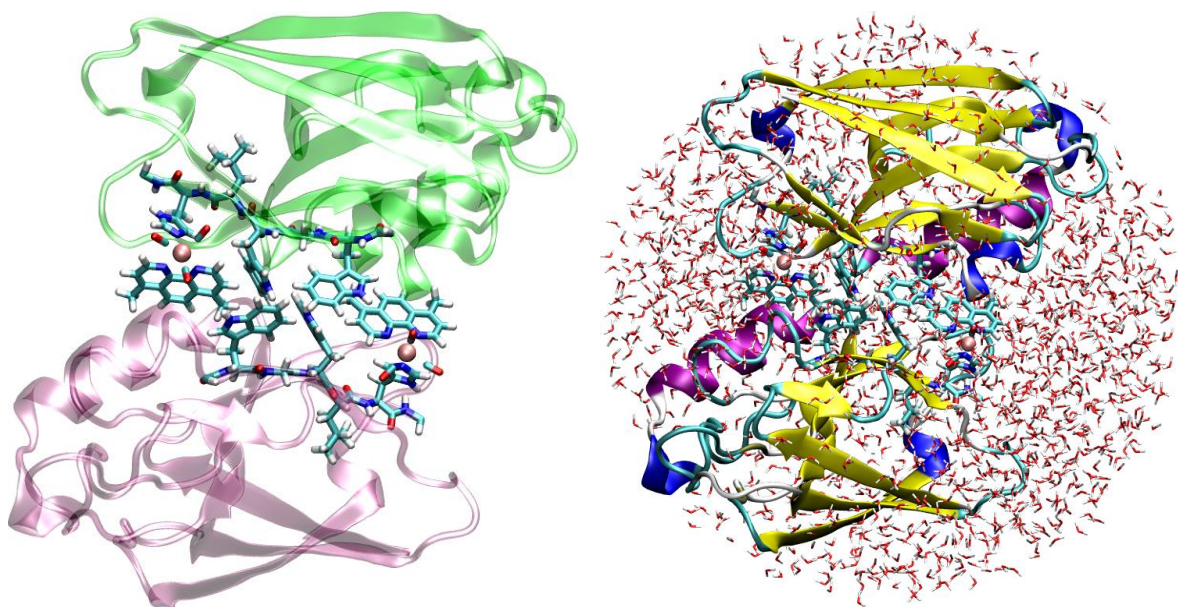

**Figure S3.** QM/MM optimized structure of  $\{\text{Re126WWCu}\}_2$  solvated with 2088 explicit water molecules. Shown without (left) and with surrounding water (right).

**Table S2.** Experimental and calculated shortest atom-atom *intermolecular* distances between redox cofactors of  $\{\text{Re126WWCu}\}_2$ . (Only aromatic C and N atoms, as well as Re and Cu are considered. Experimental values from Table 1.)

| Distance (Å)     | Experiment<br>$\{\text{Re126WWCu}\}_2$ | QM/MM<br>$\{\text{Re126WWCu}\}_2$ | DFT<br>model <sup>a</sup> |
|------------------|----------------------------------------|-----------------------------------|---------------------------|
| Re-W122'         | 7.0                                    | 6.5                               | 4.7                       |
| dmp-W122'        | 3.8                                    | 3.5                               | 4.4                       |
| W124-W122'       | 3.3                                    | 3.4                               | 3.5                       |
| W124-W124'       | 3.5-4.8 <sup>b</sup>                   | 3.3                               | 3.2                       |
| W122-W122'       | 3.7                                    | 3.5                               | 3.8                       |
| <b>Angle (°)</b> |                                        |                                   |                           |
| dmp-W122'        | 15.1-10.6                              | 19.7                              | 26.8                      |
| W124-W122'       | 84.4-68.1 <sup>b</sup>                 | 73.7                              | 57.7                      |
| W124-W124'       | 4.3-17.6 <sup>c</sup>                  | 6.7                               | 19.8                      |

<sup>a</sup> Bare  $\{\text{Re}(\text{CO})_3(\text{dmp})\text{H126L125W124G123W122}\}_2$  in a water dielectric-continuum shown in Figure S2. <sup>b</sup> 3.5/4.8 Å and 84.4/68.1° correspond to B-C/A-D interfaces. <sup>c</sup> 4.3/17.6 correspond to B-C/A-D interfaces.

## S2. Luminescence decay

### S2.1. Re126FWCu<sup>II</sup>

Luminescence decay of **Re126FWCu<sup>II</sup>** was measured in two sets of experiments: one in the 12-198  $\mu\text{M}$  concentration range using  $\sim 8$  ns, 355 nm laser excitation and PMT detection that produced tri-exponential ( $\sim 50$ ,  $\sim 300$  ns, and low-amplitude  $\sim 1.1$   $\mu\text{s}$ ) decay kinetics. The minor  $\sim 1.1$   $\mu\text{s}$  component is likely due to contamination with the  $\text{Cu}^{\text{I}}$  form. In analogy with previously studied **{Re126TWCu<sup>II</sup>}<sub>2</sub>**,<sup>1</sup> the  $\sim 50$  and  $\sim 300$  ns decays are attributed to \*Re luminescence from dimers, where it undergoes *intermolecular* ET quenching, and from unreactive monomers, respectively. The second set of measurements was carried out on more concentrated samples (0.3-1.2 mM) using  $\sim 80$  ps, 373 nm pulses and TCSPC detection. These experiments were carried out in three different time ranges: 0-50 (7.07 ps/channel), 0-100 (57.25 ps/channel), and 0-1000 ns (486 ps/channel). These measurements showed multiexponential pico- and nanosecond decays. (The  $\sim 1$   $\mu\text{s}$  component was absent.) The data are summarized in Tables S2-4. (Amplitudes are defined as normalized pre-exponential factors. IRF iterative deconvolution with a multiexponential fitting model was used for all data obtained.)

To demonstrate the dimerization equilibrium between ET-inactive **Re126FWCu<sup>II</sup>** monomer ( $\sim 300$  ns) and reactive dimer ( $\sim 50$  ns and shorter components), we have combined the two sets of measurements and analyzed the decay kinetics in a compatible way. Figure 2 shows the concentration dependence of the amplitude of the shorter decay component(s) (that is equal to the dimer fraction, see the SI of ref.<sup>1</sup>). Its gradual asymptotic increase with increasing concentration demonstrates the presence of the equilibrium. Comparison with the analogous behavior of **Re126TWCu<sup>II</sup>**<sup>1</sup> indicates that replacing the 124 threonine by aromatic phenylalanine increases the dimerization constant from about  $6 \times 10^3$  to roughly  $1.6 \times 10^4$   $\text{M}^{-1}$ .

Experiments with picosecond time resolution (Tables S4, S5) show that the luminescence decay is dominated by a  $\sim 50$  ps component whose relative amplitude decreases from 64 to 56% when the detection wavelength is shifted from the high-energy side of the luminescence band (500 nm) to the band maximum (560 nm). Hence, the 50 ps decay is

affected by a dynamic Stokes shift that results from relaxation of the \*Re chromophore and its environment.<sup>3,4</sup> The amplitude decrease with dilution suggests that at least part of the relaxation is related to the dynamics of the protein-protein interface in the dimeric species namely hydration and mobility of protein segments in the vicinity of \*Re (Table S4). The 500-600 ps and 5 ns decays are associated with redox equilibria of the dimeric species.

**Table S3.** \*Re luminescence decay kinetics of **Re126FWCu<sup>II</sup>** measured at 560 nm by TCSPC over a 0-1000 ns range (0.486 ns/channel). 3-exponential global fit with linked lifetimes. Measured in H<sub>2</sub>O, 20 mM NaP<sub>i</sub>, pH  $\cong$  7.2.

| Lifetime<br>ns | Amplitude, % |        |        |        |
|----------------|--------------|--------|--------|--------|
|                | 1.2 mM       | 0.6 mM | 0.4 mM | 0.3 mM |
| ~8             | 45           | 31     | 29     | 35     |
| 56.2           | 30           | 30     | 28     | 23     |
| 261            | 24           | 39     | 44     | 42     |

**Table S4.** \*Re luminescence decay kinetics of 1.2 mM **Re126FWCu<sup>II</sup>** measured at 500 and 560 nm by TCSPC over a 0-50 ns range (7.07 ps/channel). 4-exponential global fit with linked lifetimes. Measured in H<sub>2</sub>O, 20 mM NaP<sub>i</sub>, pH  $\cong$  7.2.

| Lifetime<br>ns | Amplitudes, % |        |
|----------------|---------------|--------|
|                | 500 nm        | 560 nm |
| 0.04           | 64            | 56     |
| 0.54           | 13            | 12     |
| 5.1            | 12            | 13     |
| $\geq$ 50      | 11            | 19     |

**Table S5.** \*Re luminescence decay kinetics of **Re126FWCu<sup>II</sup>** measured at 500 nm by TCSPC over a 0-50 ns range (7.07 ps/channel). 4-exponential global fit with linked lifetimes. Measured in H<sub>2</sub>O, 20 mM NaP<sub>i</sub>, pH  $\cong$  7.2.

| Lifetime<br>ns | Amplitude, % |        |
|----------------|--------------|--------|
|                | 1.2 mM       | 0.4 mM |
| 0.05           | 63           | 55     |
| 0.58           | 13           | 14     |
| 5.1            | 12           | 15     |
| $\geq$ 50      | 12           | 16     |

**Re126WWCu<sup>II</sup>****Table S6.** \*Re luminescence decay kinetics of **Re126WWCu<sup>II</sup>** measured at 500 and 560 nm. 4-exponential global fit with linked lifetimes for each excitation wavelength. TCSPC detection over a 0-50 ns range (7.07 ps/channel), H<sub>2</sub>O, 20 mM NaP<sub>i</sub>, pH  $\cong$  7.2.

| Lifetime<br>ns | 1.0 mM | 0.3 mM |
|----------------|--------|--------|
|                | 500 nm | 500 nm |
| 0.06           | 56     | 51     |
| 0.31           | 38     | 42     |
| 4.2            | 3      | 4      |
| >30            | 3      | 3      |
|                | 560 nm | 560 nm |
| 0.12           | 56     | 59     |
| 0.45           | 29     | 28     |
| 6.8            | 7      | 6      |
| >40            | 8      | 7      |

**Table S7.** \*Re luminescence decay kinetics of **Re126WWCu<sup>II</sup>** measured at 500, 560, and 600 nm using TCSPC detection over a 0-50 ns range (7.07 ps/channel). 4-exponential global fit with linked lifetimes for each concentration. Measured in H<sub>2</sub>O, 20 mM NaP<sub>i</sub>, pH  $\cong$  7.2.

| 1.0 mM solution |              |        |        |
|-----------------|--------------|--------|--------|
| Lifetime<br>ns  | Amplitude, % |        |        |
|                 | 500 nm       | 560 nm | 600 nm |
| 0.06            | 56           | 41     | 43     |
| 0.32            | 38           | 44     | 42     |
| 4.7             | 3            | 6      | 5      |
| >30             | 3            | 9      | 10     |
| 0.3 mM solution |              |        |        |
| 0.08            | 52           | 45     | -      |
| 0.33            | 41           | 41     | -      |
| 4.8             | 4            | 5      | -      |
| >40             | 3            | 8      | -      |

**Table S8.** \*Re luminescence decay kinetics of **Re126WFCu<sup>II</sup>** measured at 560 nm by TCSPC over a 0-1000 ns range (0.486 ns/channel). 3-exponential global fit with linked lifetimes. Measured in H<sub>2</sub>O, 20 mM NaP<sub>i</sub>, pH  $\cong$  7.2.

| Lifetime<br>ns   | Amplitude, % |        |
|------------------|--------------|--------|
|                  | 1.0 mM       | 0.3 mM |
| ~11              | 58           | 45     |
| 66               | 31           | 46     |
| 311 <sup>a</sup> | 11           | 9      |

<sup>a</sup>The minor 311 ns decay corresponds to the hundreds-of-nanosecond minor kinetics component observed by TRIR. It is likely related to intermolecular ET kinetics.

### **Re126WFCu<sup>II</sup>**

**Table S9.** \*Re luminescence decay kinetics of 1.8 mM **Re126WFCu<sup>II</sup>** measured at 500 and 560 nm and TCSPC detection over a 0-50 ns range (7.07 ps/channel). 4-exponential global fit with linked lifetimes. Measured in H<sub>2</sub>O, 20 mM NaP<sub>i</sub>, pH  $\cong$  7.2.

| Lifetime<br>ns | Amplitude, % |        |
|----------------|--------------|--------|
|                | 500 nm       | 560 nm |
| 0.05           | 69           | 54     |
| 0.27           | 23           | 29     |
| 4.14           | 4            | 6      |
| ~40            | 4            | 11     |



### S3. Time-resolved IR spectroscopy and mechanisms

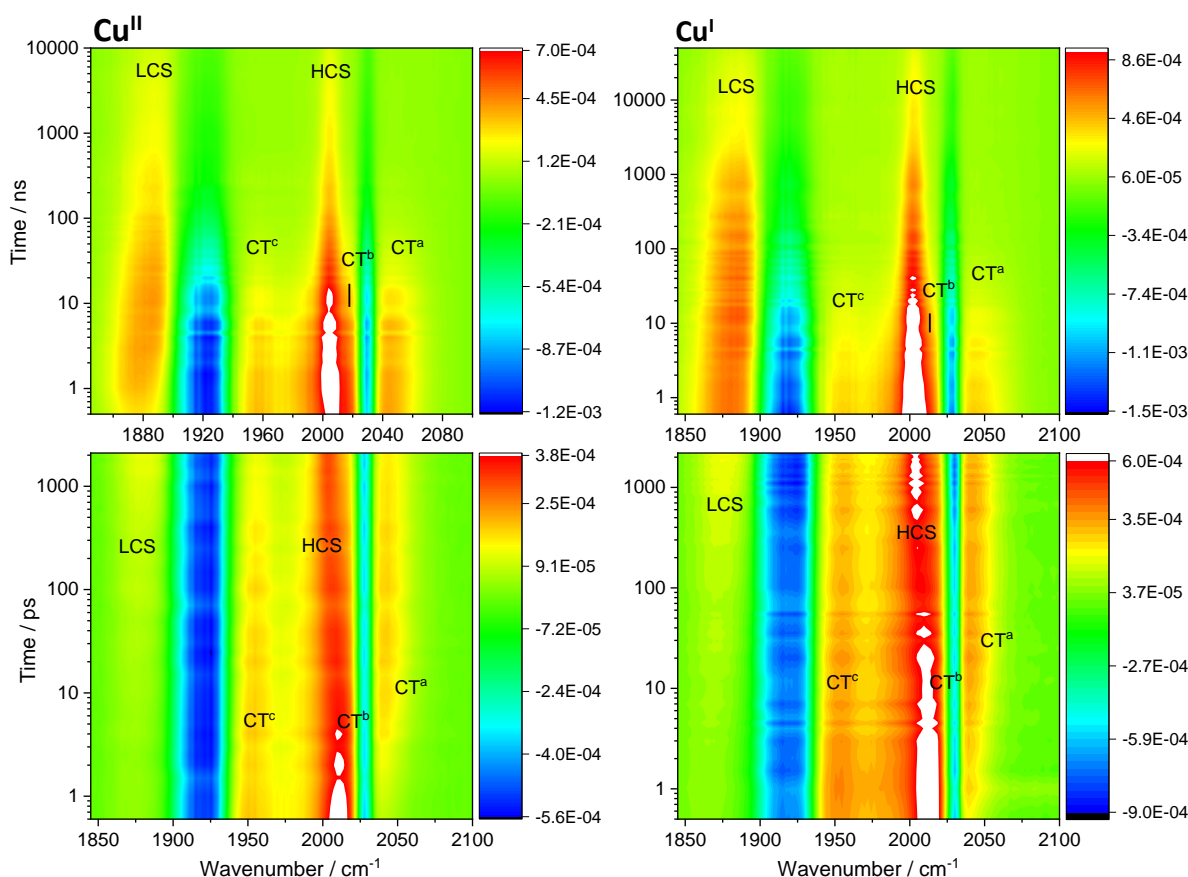

**Figure S4.** Difference TRIR spectra of **Re126WWCu<sup>II</sup>** (left) and **Re126WWCu<sup>I</sup>** (right). Negative (blue) features correspond to depleted ground-state population; positive features correspond to photogenerated transients (yellow-orange-red-white in the order of increasing intensity). Picosecond spectra (bottom) were measured in  $\sim 1.5$  mM/ $\text{H}_2\text{O}$  ( $\text{Cu}^{\text{II}}$ ), and  $\sim 1.6$  mM/ $\text{D}_2\text{O}$  ( $\text{Cu}^{\text{I}}$ ) solutions, 20 mM  $\text{KP}_i$ , pH ( $\text{pD} \cong 7.1$ ) using 355 and 400 nm excitation, respectively. Spectra obtained at 0.5 ps show the ground-state bleach ( $\sim 1922, 2030 \text{ cm}^{-1}$ ), features due to a hot CT state, and a weak LCS signal formed within the instrument time resolution. Nanosecond spectra were measured in  $\sim 1.5$  mM/ $\text{H}_2\text{O}$  ( $\text{Cu}^{\text{II}}$ ), and  $\sim 1.3$  mM/ $\text{H}_2\text{O}$ , ( $\text{Cu}^{\text{I}}$ ) solutions, 20 mM  $\text{KP}_i$ , pH  $\cong 7.1$ . Excited at 355 nm. Transient bands occur at: 1956 ( $\text{CT}^{\text{II}}$ ),  $\sim 2014$  ( $\text{CT}^{\text{I}}$ ), 2043 (CT),  $2004 \text{ cm}^{-1}$  (HCS). The LCS bands shift from  $\sim 1873$  (1 ps) to  $\sim 1887 \text{ cm}^{-1}$  (10 ns) for  $\text{Cu}^{\text{II}}$  and from 1867 (1 ps) to  $\sim 1883 \text{ cm}^{-1}$  (500 ns) for  $\text{Cu}^{\text{I}}$ . (Maxima values are only apparent as LCS overlaps with the bleach.) Similar spectra were obtained in a 0.5-1 mM concentration range.

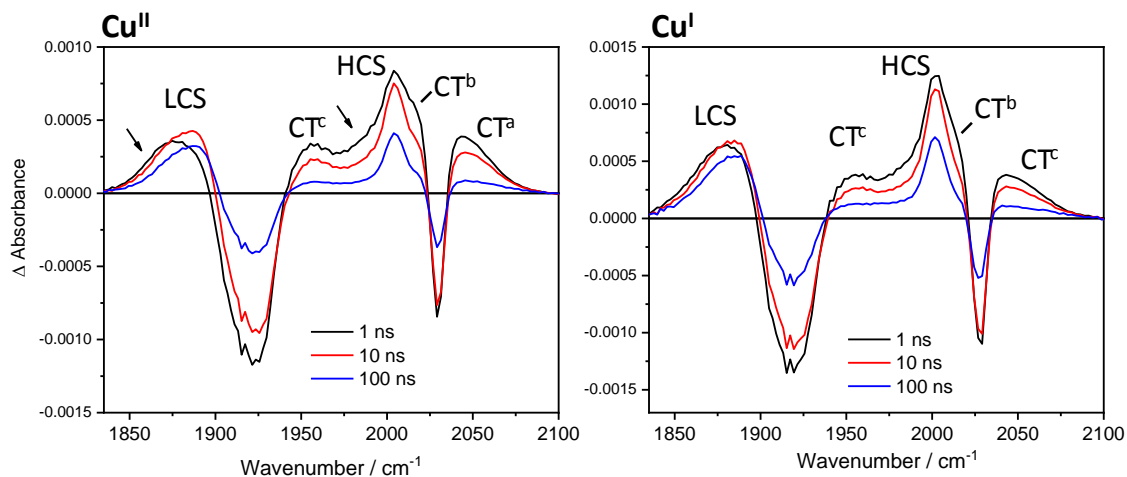

**Figure S5.** Difference nanosecond TRIR spectra of **Re126WWCu<sup>II</sup>** (left) and **Re126WWCu<sup>I</sup>** (right) measured at 1, 10, and 100 ns after 355 nm, 700 ps excitation. Arrows indicate early-time CS band broadening. (Narrowing of the LCS band between 1 and 10 ns is not apparent in the left panel because of a larger CS intensity rise.) Experimental conditions as in the top two panels of Figure S2.

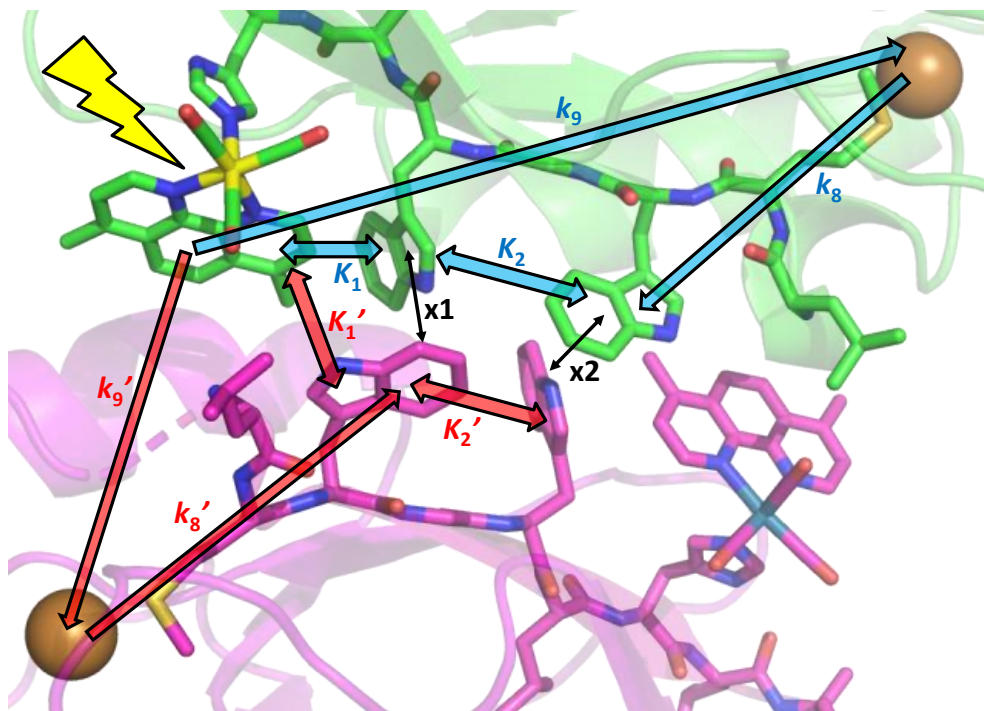

**Figure S6.** *Intra-* (blue) and *intermolecular* (red) ET processes in **{Re126WWCu<sup>I</sup>}<sub>2</sub>**.

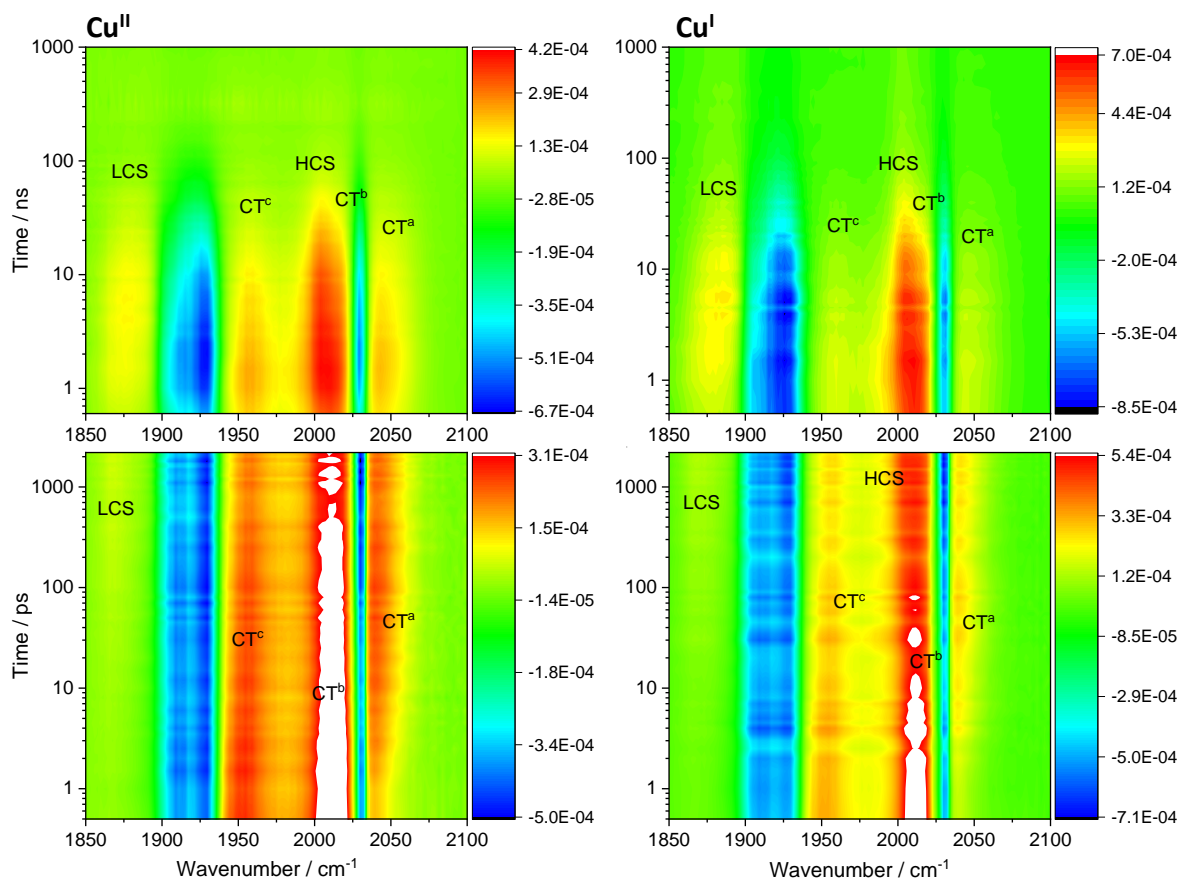

**Figure S7.** Difference TRIR spectra of **Re126WFCu<sup>II</sup>** and **Re126WFCu<sup>I</sup>**. Negative (blue) features correspond to depleted ground-state population; positive features correspond to photogenerated transients (yellow-orange-red-white in the order of increasing intensity). Picosecond spectra (bottom) were measured in 1.2 mM (Cu<sup>II</sup>) and 1 mM (Cu<sup>I</sup>) solutions in D<sub>2</sub>O, 20 mM KP<sub>i</sub>, pD  $\cong$  7.1 using 400 nm, 50 fs excitation. Spectra obtained shortly after excitation ( $\leq$  1ps) show the ground-state bleach, features due to a hot CT state and a weak CS signal formed within the instrument time resolution. Nanosecond spectra (top) were measured in 1.3 mM (Cu<sup>II</sup>) and 0.8 mM (Cu<sup>I</sup>) solutions in H<sub>2</sub>O, 20 mM KP<sub>i</sub>, pH  $\cong$  7.1. Excited at 355 nm, 0.8 ns.

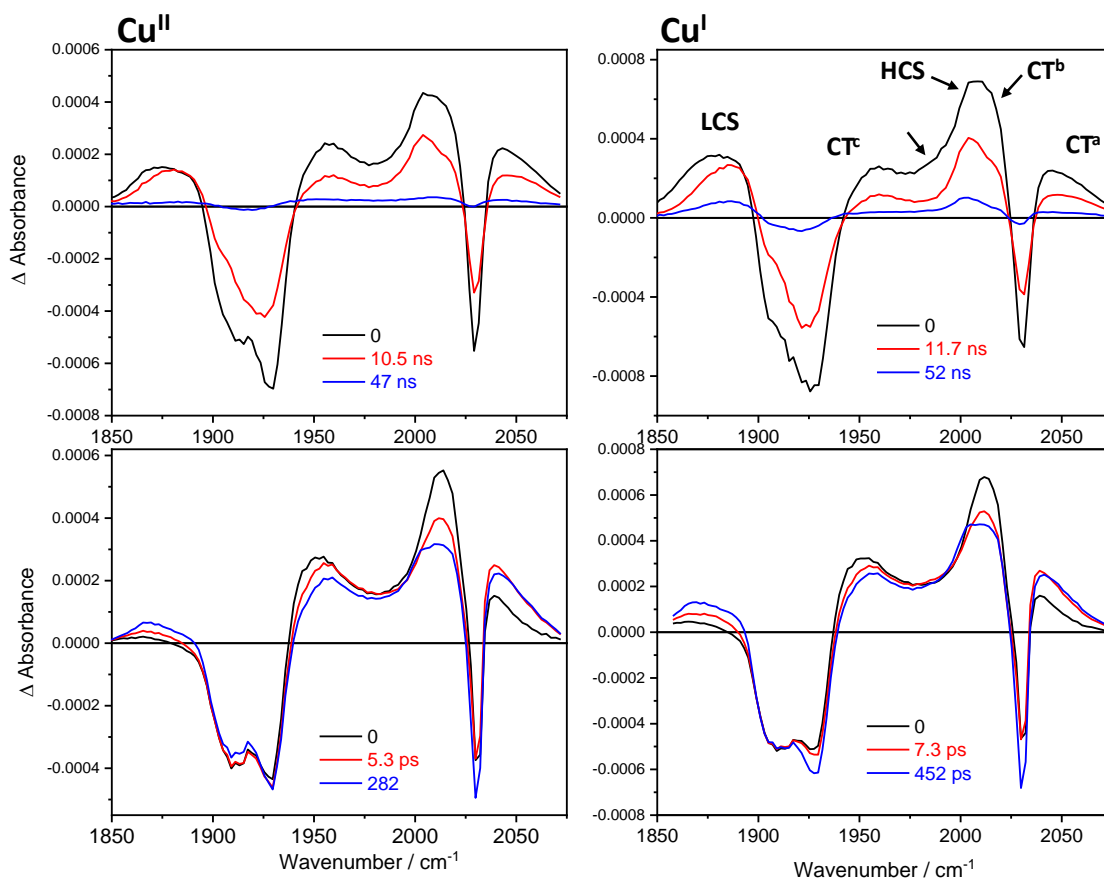

**Figure S8.** Evolution associated spectra of **Re126WFCu<sup>II</sup>** (left) and **Re126WFCu<sup>I</sup>** (right) obtained by global fit of picosecond (bottom) and nanosecond (top) 3D TRIR data (kinetic/spectral) using a sequential multiexponential model. Black curves are spectra extrapolated to time 0 and correspond to the species formed within the 355,  $\sim 0.7$  ns laser pulse excitation. Red, blue and green curves correspond to spectra associated with the specified kinetics. The longest-lifetime spectra correspond to the residual species that remains after a process characterized by the specified time constant and decays on a timescale longer than the measurement. Band labelling in the top-right panel is valid for all spectra shown. The unlabeled arrow indicates decay of the LCS early-time broadening and of the  $\sim 1985$   $\text{cm}^{-1}$  shoulder. Experimental conditions as in Figure S7.

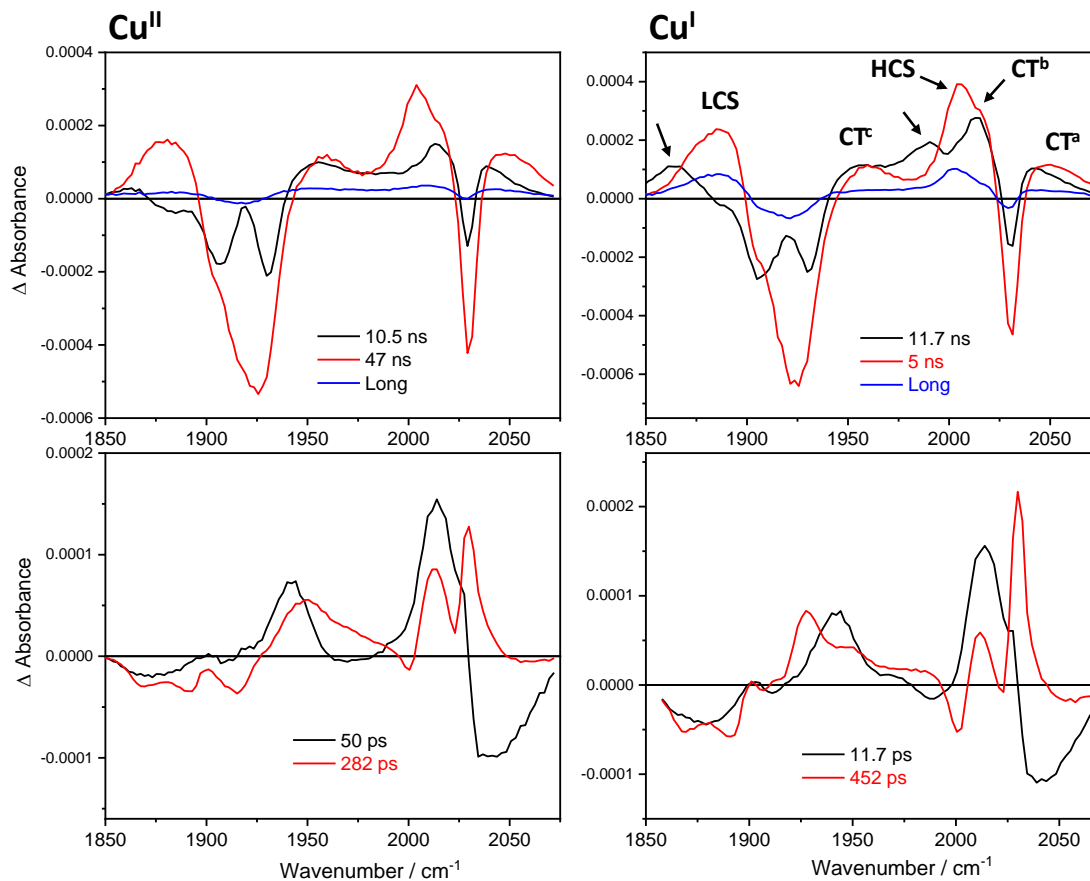

**Figure S9.** Decay associated spectra of  $\text{Re126WFCu}^{\text{II}}$  (left) and  $\text{Re126WFCu}^{\text{I}}$  (right) obtained by global fit of picosecond (bottom) and nanosecond (top) 3D TRIR data (kinetic/spectral) using a sequential multiexponential model. Negative and positive features correspond to signal rise and decay, respectively. Band labelling in the top-right panel is valid for all spectra shown. The unlabeled arrow indicates decay of the LCS early-time broadening and of the  $\sim 1985 \text{ cm}^{-1}$  shoulder. Experimental conditions as in Figure S7.

## S4. Representative kinetics fits

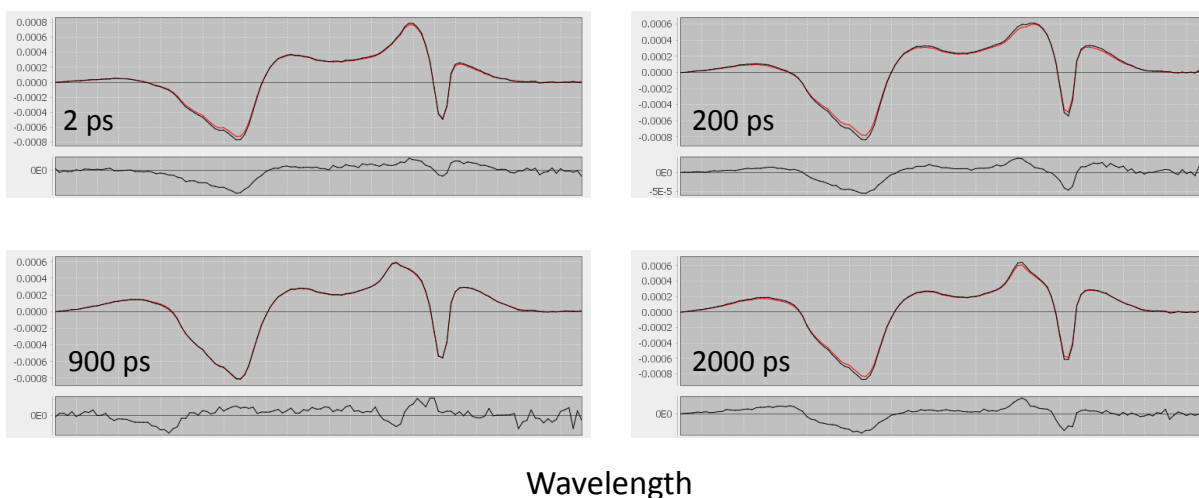

**Figure S10.** Experimental (black) and fitted (red) picosecond TRIR spectra of  $\text{Re126FWCu}^{\text{I}}$  at selected time delays. Residuals are shown below the spectra. Conditions as in Figures 4 and 5. The x-axis is calibrated in detector pixels, corresponding to IR-probe wavelength.

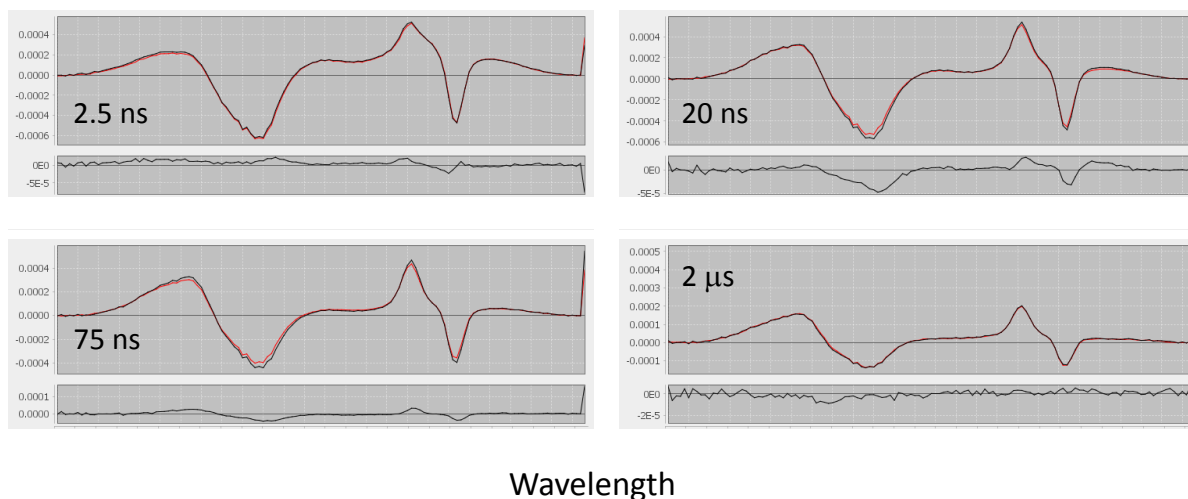

**Figure S11.** Experimental (black) and fitted (red) nanosecond TRIR spectra of  $\text{Re126FWCu}^{\text{I}}$  at selected time delays. Residuals are shown below the spectra. Conditions as in Figures 4 and 5. The x-axis is calibrated in detector pixels, corresponding to IR-probe wavelength.

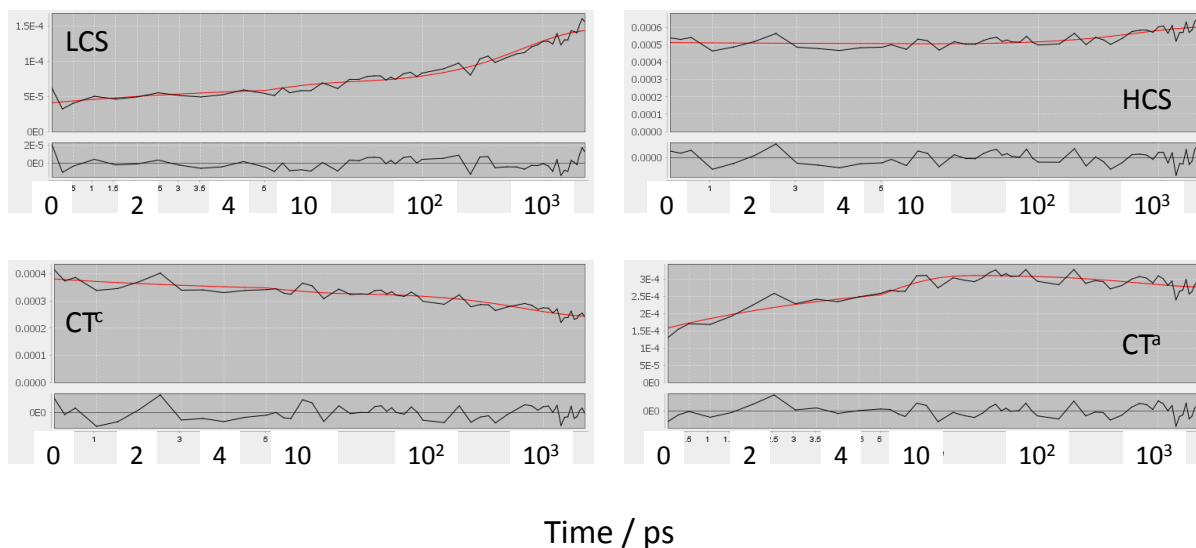

**Figure S12.** Experimental (black) and fitted (red) time profiles of picosecond TRIR differential absorbance of **Re126FWCu<sup>I</sup>** measured at maxima of selected IR features. Residuals are shown below the profiles. Conditions as in Figures 4 and 5. The initial  $CT^a$  rise is due to relaxation. The first 5 ps are shown on a linear scale, the 5-2100 range is on a logarithmic scale.

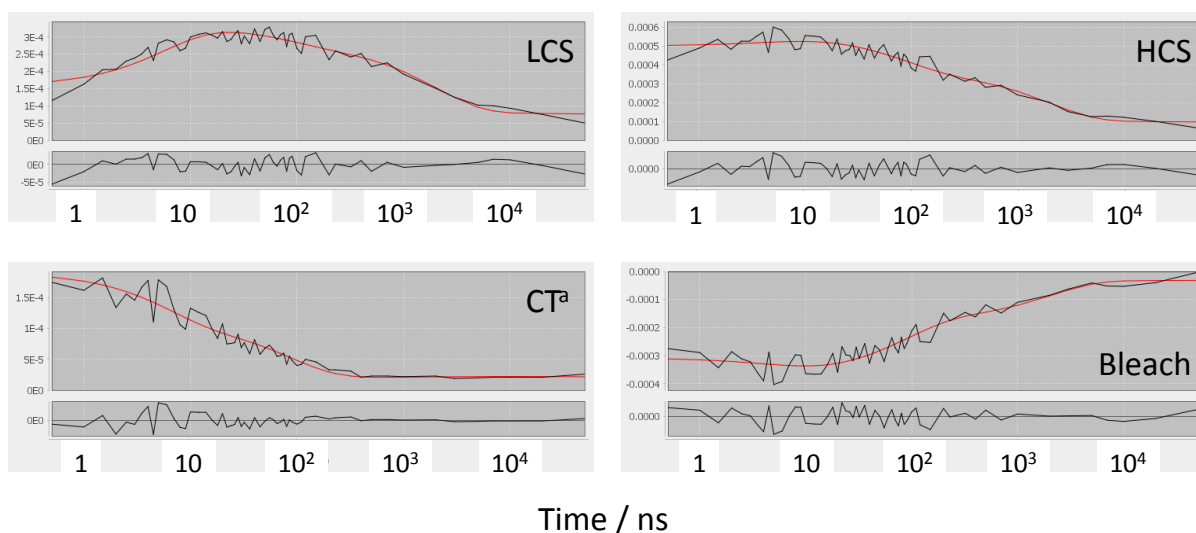

**Figure S13.** Experimental (black) and fitted (red) time profiles of nanosecond TRIR differential absorbance of **Re126FWCu<sup>I</sup>** measured at maxima of selected IR features. Residuals are shown below the profiles. Conditions as in Figures 4 and 5. Bleach profile measured at  $2028\text{ cm}^{-1}$ .

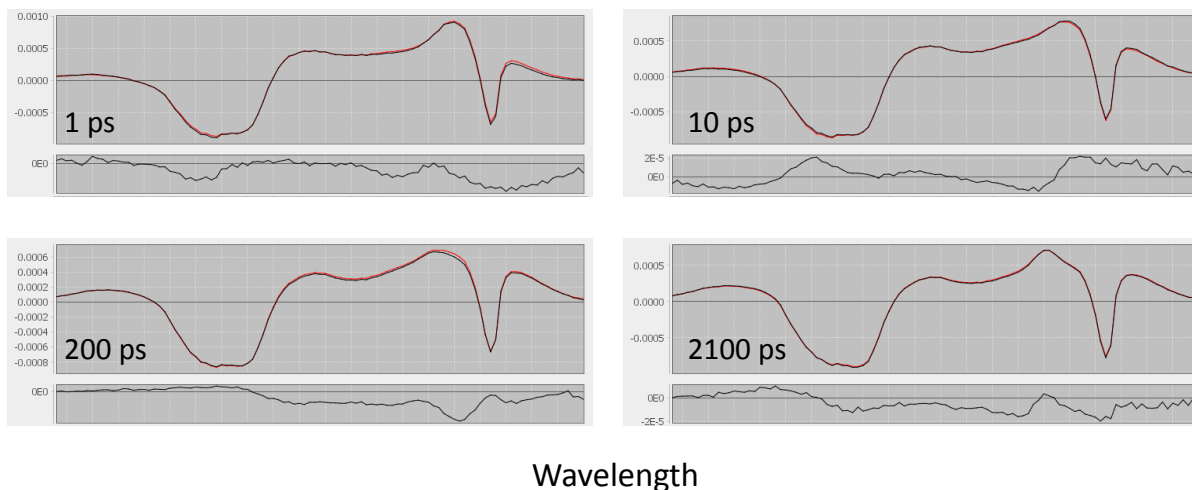

**Figure S14.** Experimental (black) and fitted (red) picosecond TRIR spectra of **Re126WWCu<sup>I</sup>** at selected time delays. Residuals are shown below the spectra. Conditions as in Figures 6 and 7. The x-axis is calibrated in detector pixels, corresponding to IR-probe wavelength.

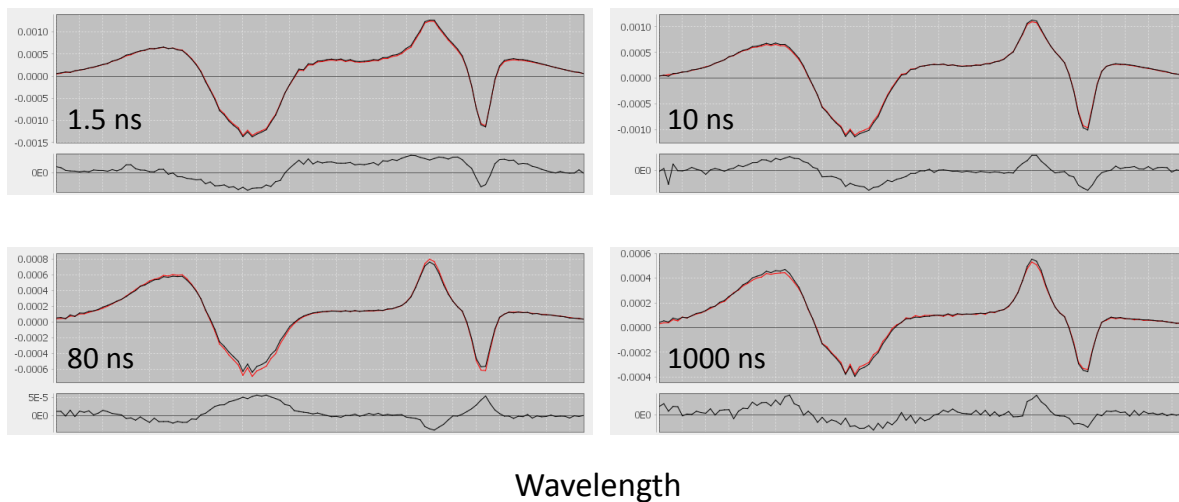

**Figure S15.** Experimental (black) and fitted (red) nanosecond TRIR spectra of **Re126WWCu<sup>I</sup>** at selected time delays. Residuals are shown below the spectra. Conditions as in Figures 6 and 7. The x-axis is calibrated in detector pixels, corresponding to IR-probe wavelength.



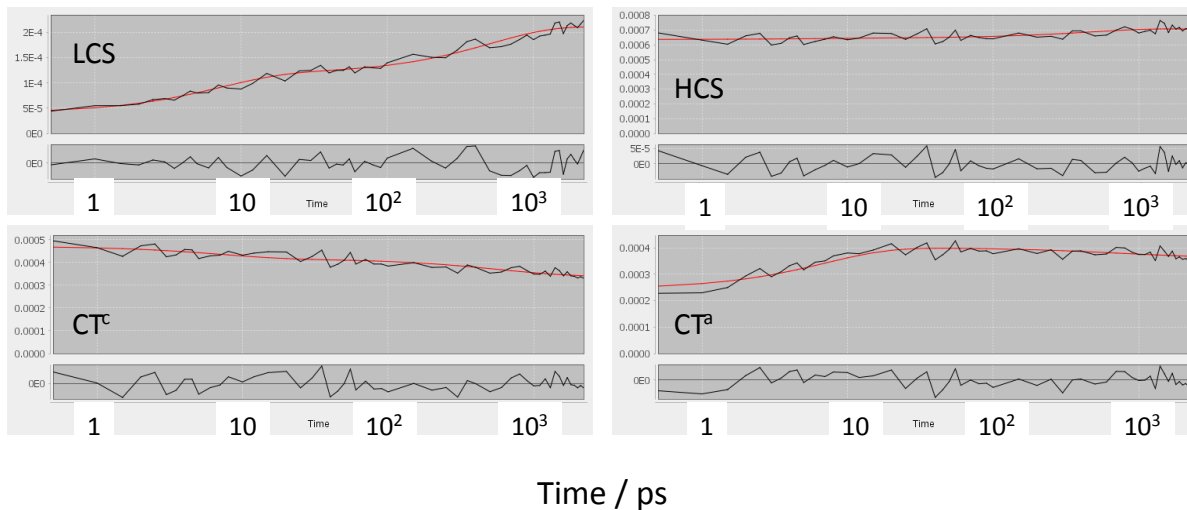

**Figure S16.** Experimental (black) and fitted (red) time profiles of picosecond TRIR differential absorbance of  $\text{Re126WWCu}^{\text{I}}$  measured at maxima of selected IR features. Residuals are shown below the profiles. Conditions as in Figures 6 and 7. The initial  $\text{CT}^{\text{a}}$  rise is due to relaxation.

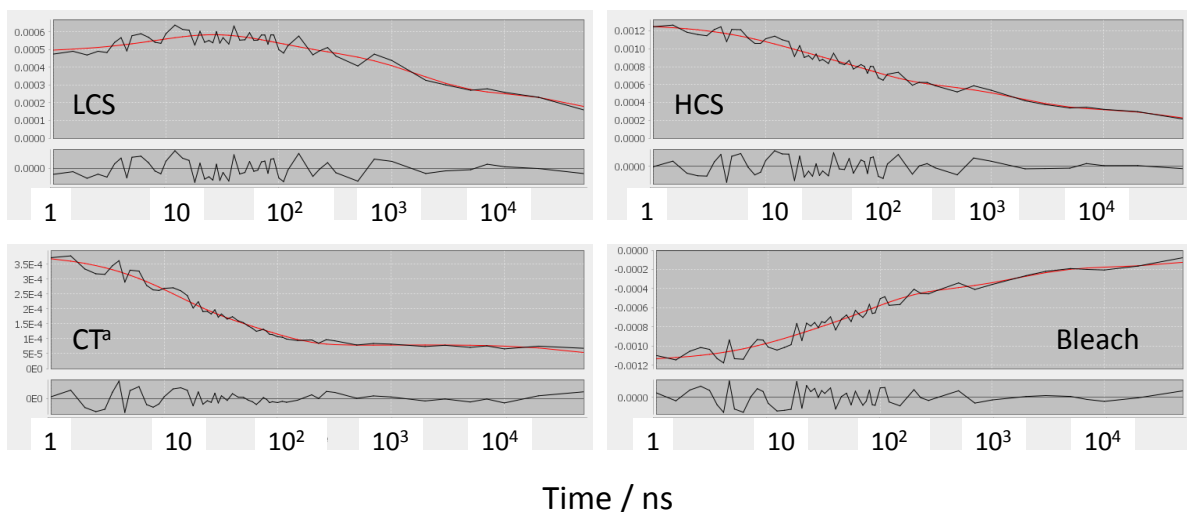

**Figure S17.** Experimental (black) and fitted (red) time profiles of nanosecond TRIR differential absorbance of  $\text{Re126WWCu}^{\text{I}}$  measured at maxima of selected IR features. Residuals are shown below the profiles. Conditions as in Figures 6 and 7. Bleach profile measured at  $2028\text{ cm}^{-1}$ .

## References

1. Takematsu, K.; Williamson, H.; Blanco-Rodríguez, A. M.; Sokolová, L.; Nikolovski, P.; Kaiser, J. T.; Towrie, M.; Clark, I. P.; Vlček, A., Jr.; Winkler, J. R.; Gray, H. B., Tryptophan-accelerated electron flow across a protein-protein interface. *J. Am. Chem. Soc.* **2013**, *135*, 15515–15525.
2. Takematsu, K.; Williamson, H.; Nikolovski, P.; Kaiser, J. T.; Pospíšil, P.; Towrie, M.; Heyda, J.; Hollas, D.; Záliš, S.; Gray, H. B.; Vlček, A.; Winkler, J. R., Two tryptophans are better than one in accelerating electron flow through a protein. *ACS Cent. Sci.*, *submitted*.
3. Horng, M. L.; Gardecki, J. A.; Papazyan, A.; Maroncelli, M., Subpicosecond Measurements of Polar Solvation Dynamics: Coumarin 153 Revisited. *J. Phys. Chem.* **1995**, *99*, 17311-17337.
4. Blanco-Rodríguez, A. M.; Busby, M.; Ronayne, K. L.; Towrie, M.; Grădinaru, C.; Sudhamsu, J.; Sýkora, J.; Hof, M.; Záliš, S.; Di Bilio, A. J.; Crane, B. R.; Gray, H. B.; Vlček, A., Jr., Relaxation Dynamics of  $[\text{Re}^{\text{I}}(\text{CO})_3(\text{phen})(\text{HisX})]^+$  (X = 83, 107, 109, 124, 126) *Pseudomonas aeruginosa* Azurins. *J. Am. Chem. Soc.* **2009**, *131*, 11788-11800.
